# Supplementary material for: Prognostic significance of tumor-associated macrophages polarization markers in lung cancer: a pooled analysis of 5105 patients
Source: Oxford University Press journal article supplement (doi:10.1042/bsr20221659), 2023-01-12
Supplement: bsr-2022-1659_supp.pdf [file bsr-2022-1659_supp.pdf]

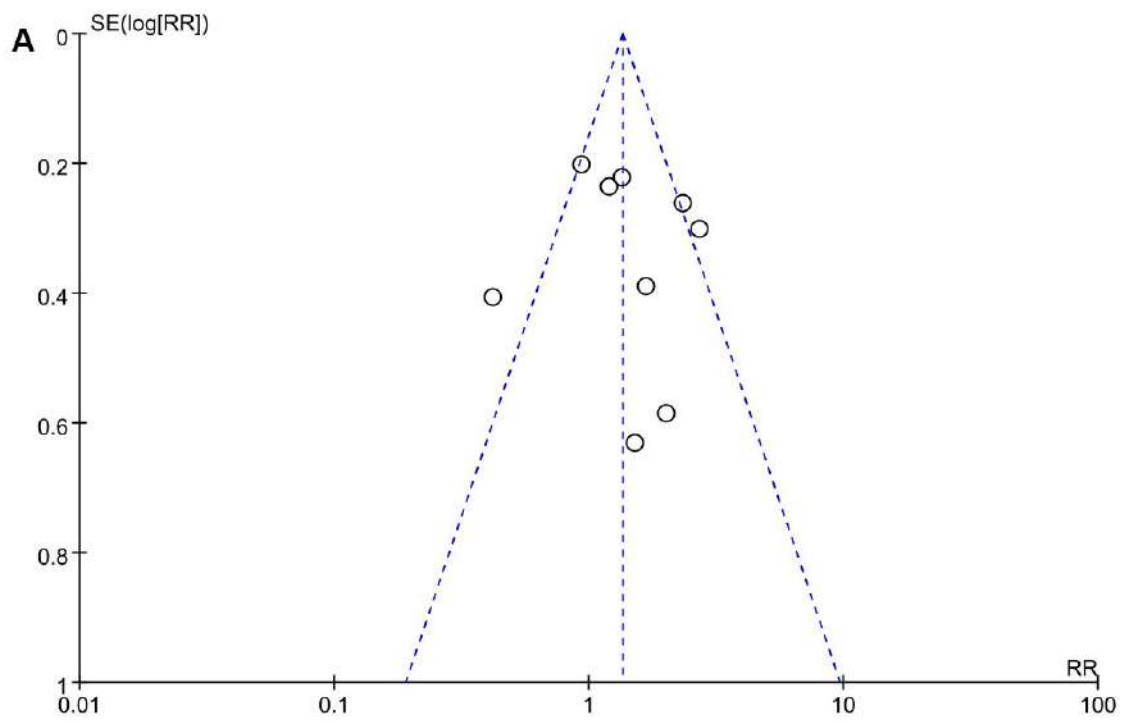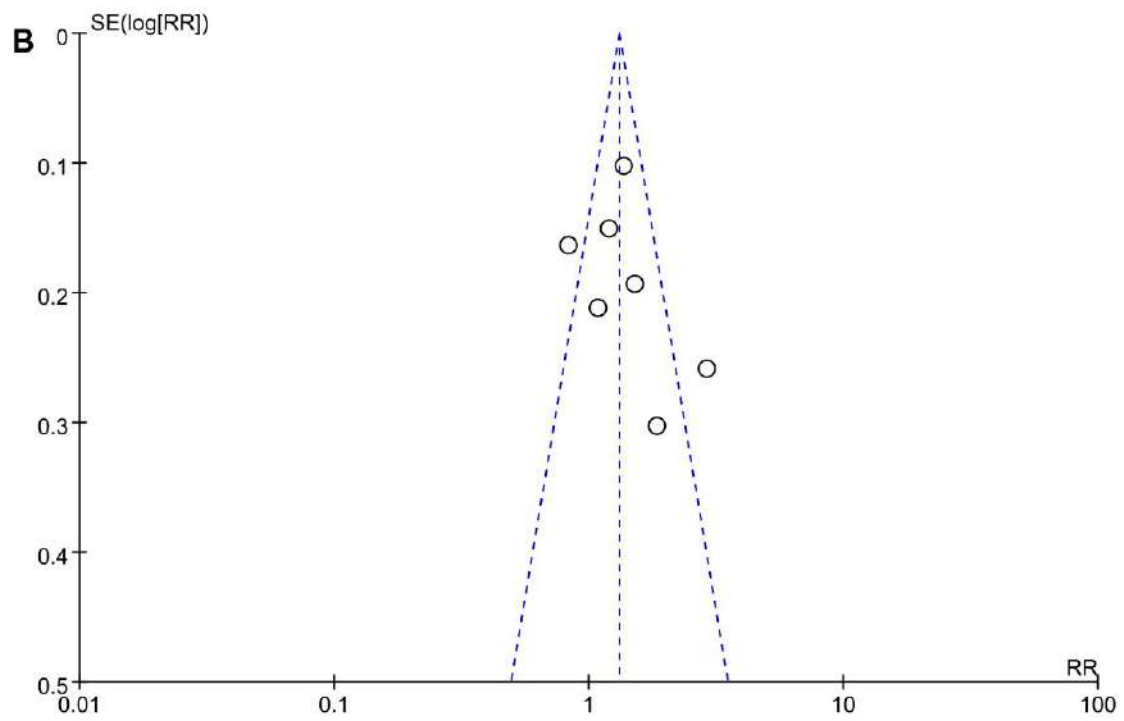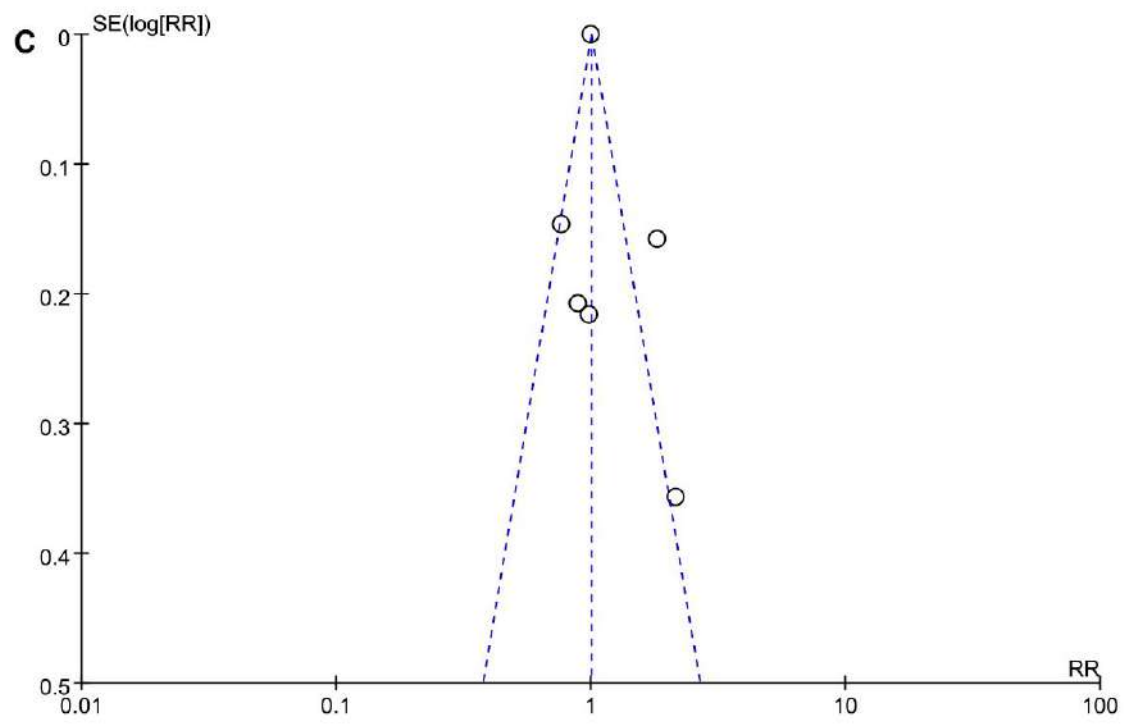

**Supplementary Figure S1** Funnel plot of studies with TAM density for potential publication bias assessment. (A) OS and CD68+ TAMs in the tumor; (B) OS and CD68+ TAMs in the tumor stroma; (C) OS and CD163+ TAMs in the tumor stroma.
